# Supplementary figures and images for: Ultrafiltration Harvesting of Microalgae Culture Cultivated in a WRRF: Long-Term Performance and Techno-Economic and Carbon Footprint Assessment
Source: Preprints.org preprint supplement (doi:10.20944/preprints202312.0254.v1), 2023-12-05

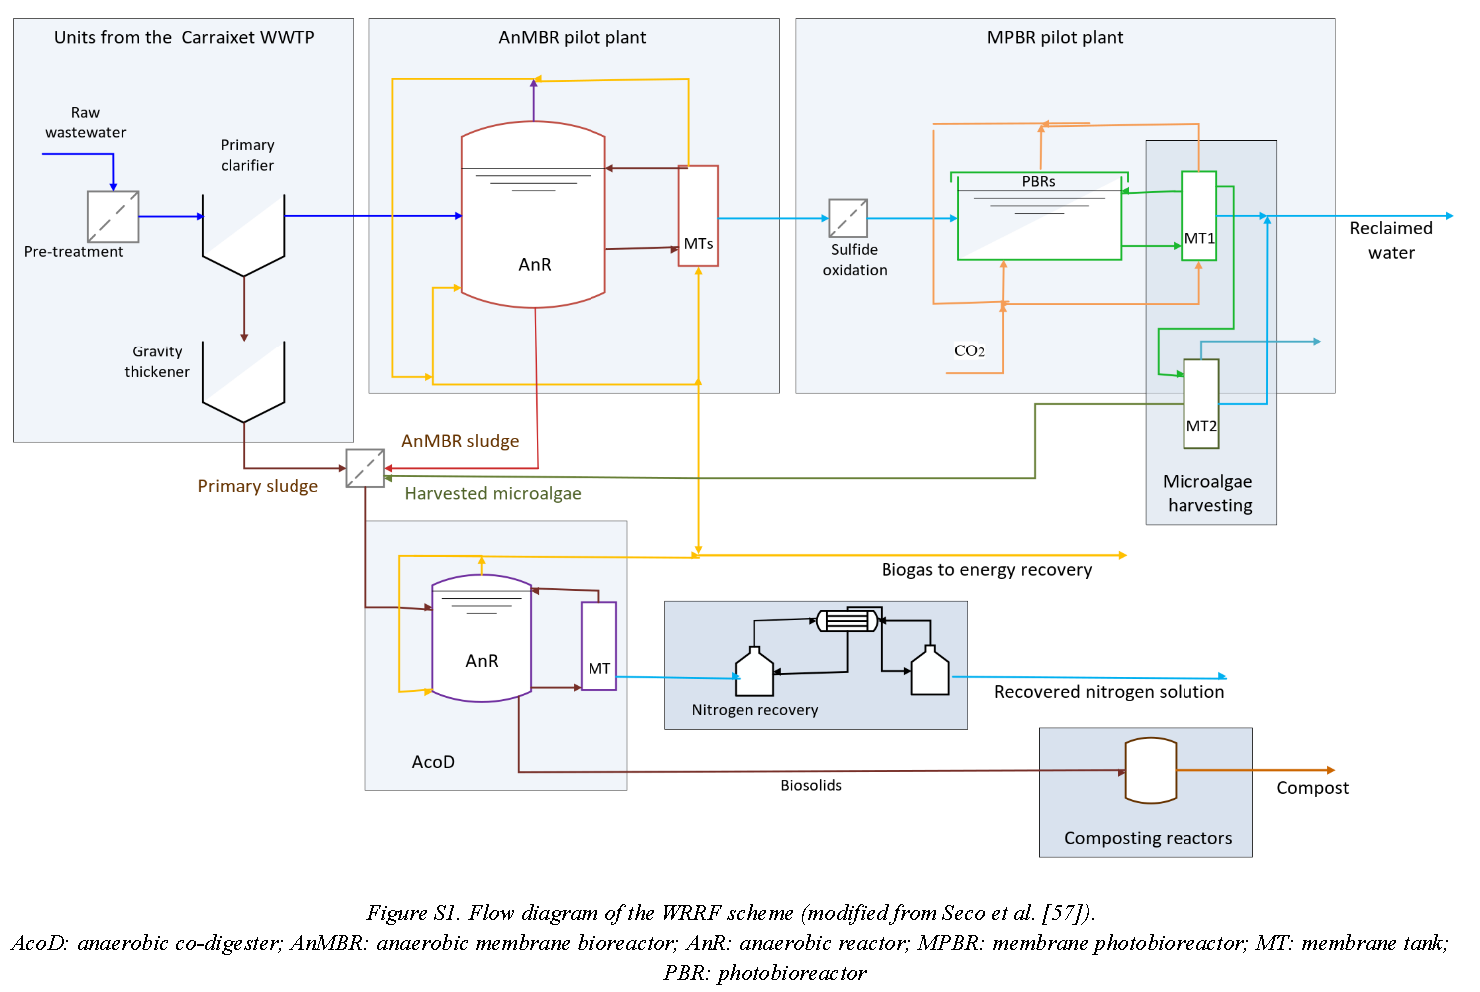

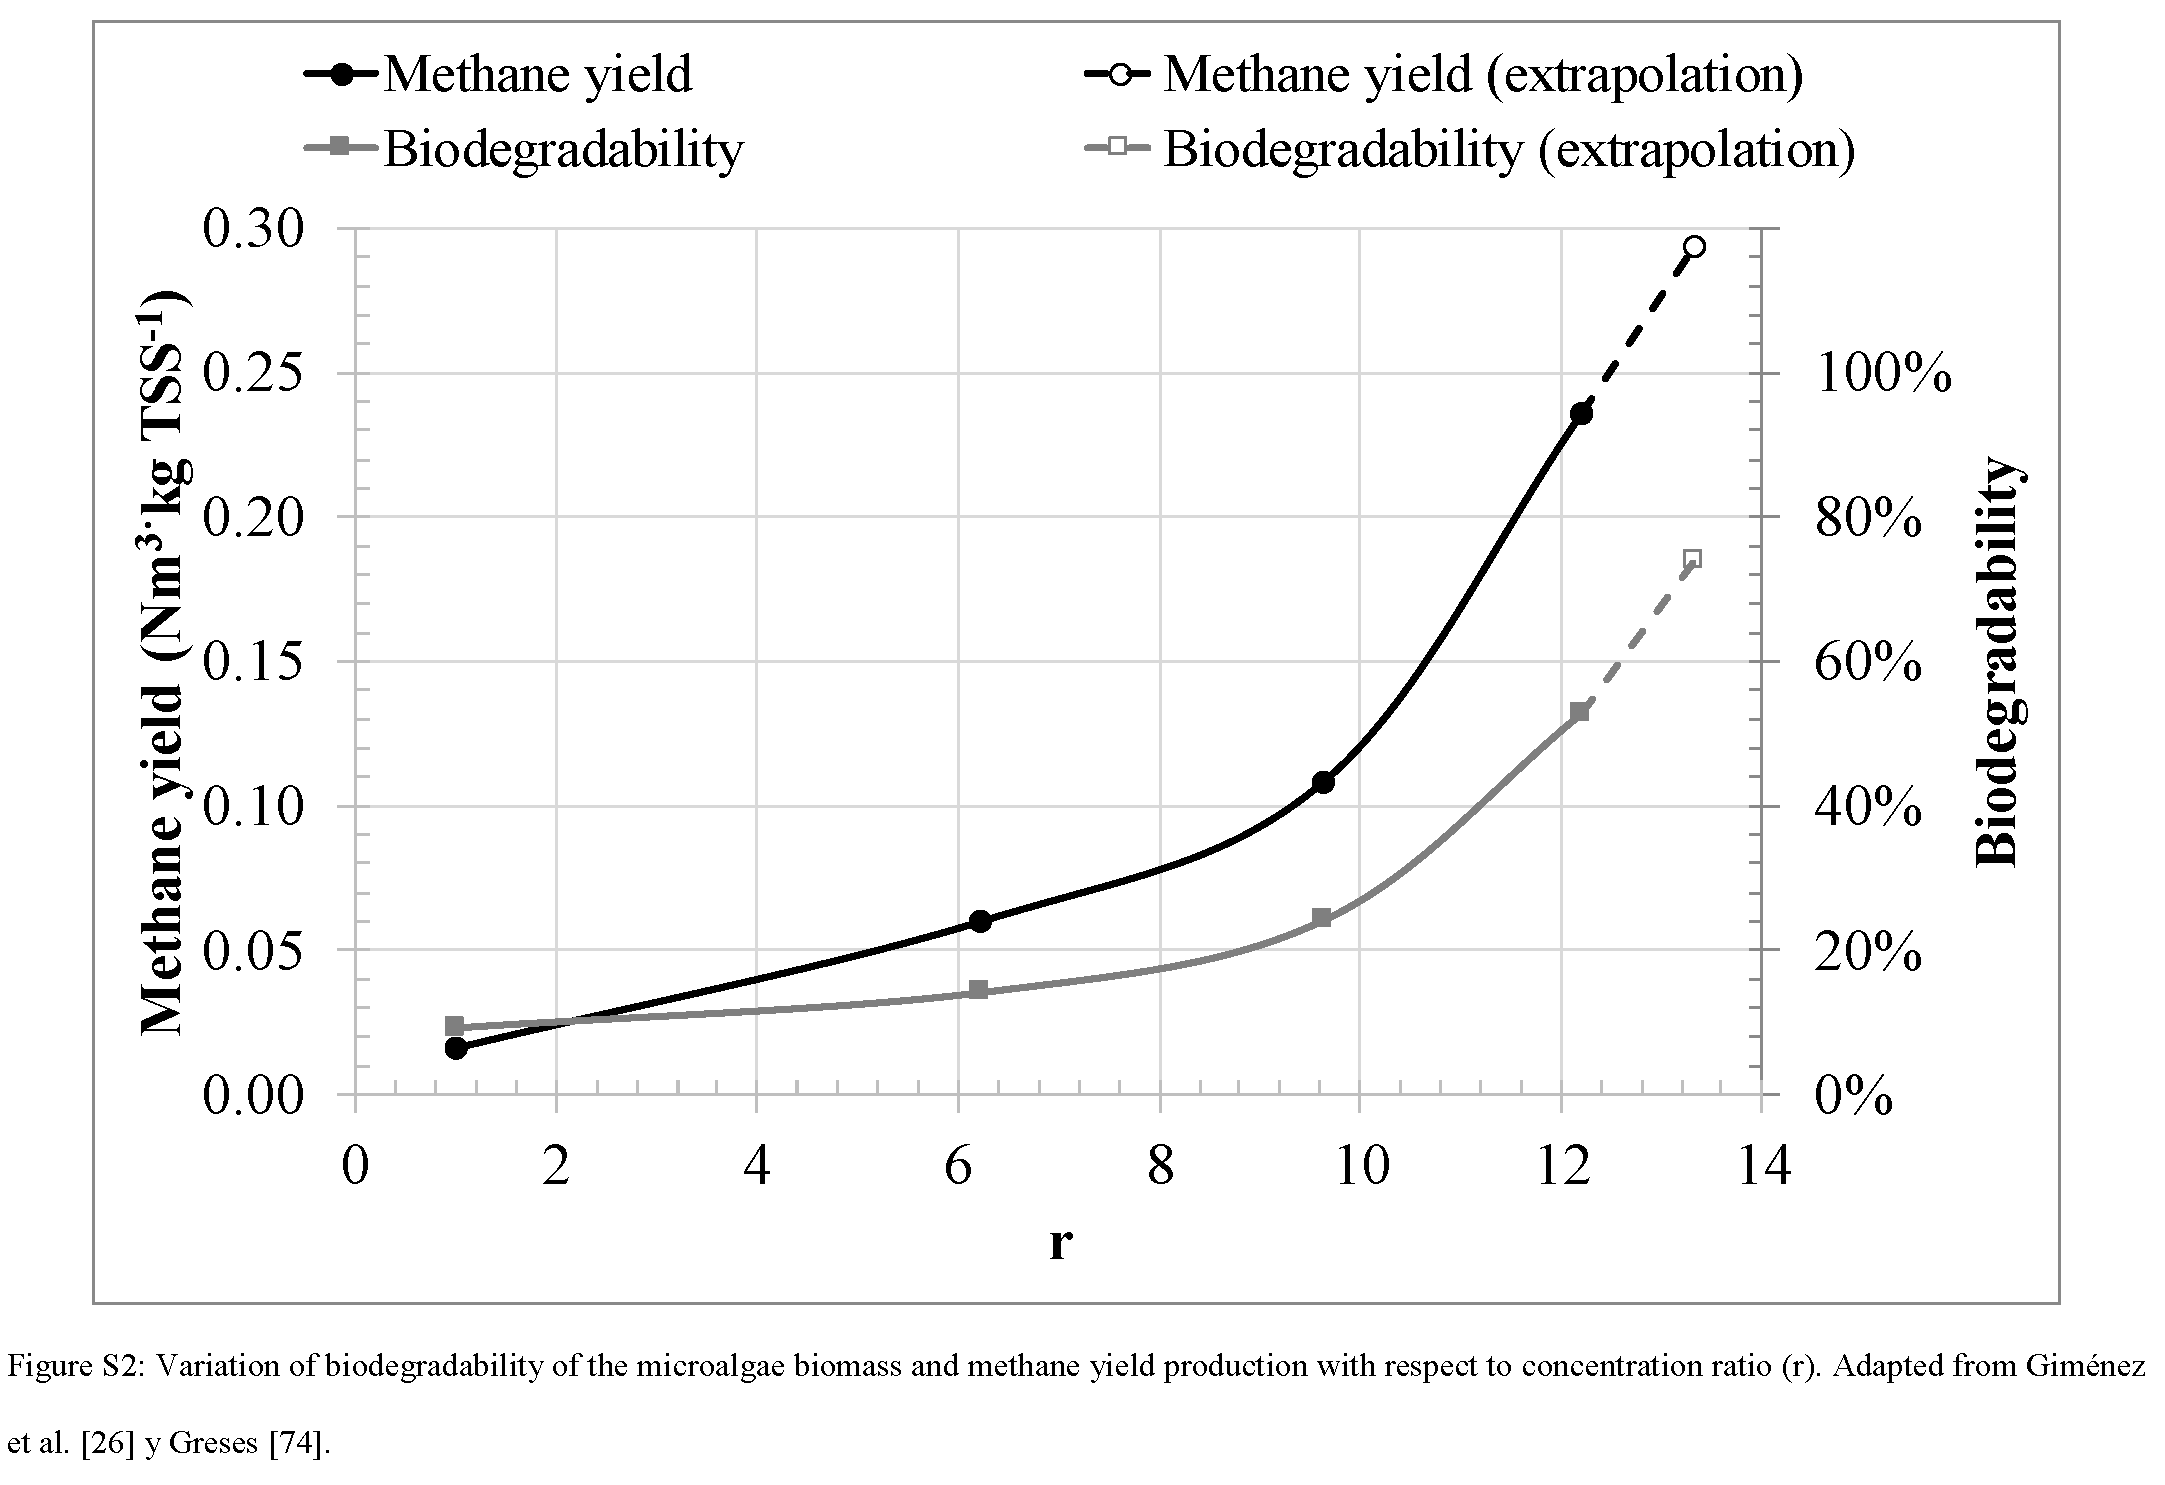

Supplement: Supplementary file 1 [file supplementary]
